# Supplementary material for: Information on, knowledge and utilisation of support services during pregnancy and after childbirth: cross-sectional analyses of predictors using data from the KUNO-Kids health study
Source: PubMed Central journal article supplement — BMJ Open. 2020 Oct 26;10(10):e037745. doi: 10.1136/bmjopen-2020-037745 (PMC7592309; doi:10.1136/bmjopen-2020-037745), 2020-10-26
Supplement: bmjopen-2020-037745supp001.pdf [file bmjopen-2020-037745supp001.pdf]

**Online supplementary table****Characteristics of all study participants and of study participants with data on knowledge and utilization of services**

|                                                           |      | <i>All participants</i> |      | <i>Participants with data on knowledge/utilization of services</i> |
|-----------------------------------------------------------|------|-------------------------|------|--------------------------------------------------------------------|
|                                                           |      | <i>N=2494</i>           |      | <i>N=2455</i>                                                      |
| Age (years); M (SD)                                       | 2464 | 34.0 (4.59)             | 2427 | 34.0 (4.56)                                                        |
| Primiparous; N (%)                                        | 2477 | 1385 (55.9)             | 2448 | 1368 (55.9)                                                        |
| Marital status                                            | 2449 |                         | 2448 |                                                                    |
| Married, living together with husband; N (%)              |      | 1921 (78.4)             |      | 1920 (78.4)                                                        |
| Unmarried, living together with partner; N (%)            |      | 468 (19.1)              |      | 468 (19.1)                                                         |
| Unmarried and without partner, divorced or widowed; N (%) |      | 60 (2.4)                |      | 60 (2.5)                                                           |
| Educational level                                         | 2439 |                         | 2438 |                                                                    |
| Low (< 10 years of schooling; N (%))                      |      | 274 (11.2)              |      | 274 (11.2)                                                         |
| Medium (10 years of schooling; N (%))                     |      | 794 (32.6)              |      | 794 (32.6)                                                         |
| High (university entrance level); N (%)                   |      | 1371 (56.2)             |      | 1370 (56.2)                                                        |
| Employed before giving birth; N (%)                       | 2444 | 2139 (87.5)             | 2443 | 2139 (87.6)                                                        |
| Born in Germany; N (%)                                    | 2451 | 2077 (84.7)             | 2450 | 2077 (84.8)                                                        |
| Statutory health insurance, N (%)                         | 2443 | 2080 (85.1)             | 2442 | 2079 (85.1)                                                        |
| Health literacy; M (SD)                                   | 2403 | 35.4 (7.2)              | 2399 | 35.4 (7.2)                                                         |

Notes: M: mean; SD: standard deviation

Health literacy: health care scale of the HLS-EU questionnaire
